# Supplementary material for: Sulfurization-induced edge amorphization in copper–nickel–cobalt layered double hydroxide nanosheets promoting hydrazine electro-oxidation
Source: Royal Society of Chemistry journal article supplement (doi:10.1039/c9ta07857f), 2019-01-01
Supplement: c9ta07857f1.pdf [file c9ta07857f1.pdf]

## **Electronic Supplementary Information**

### **Sulfurization-Induced Edge Amorphization in Copper-Nickel-Cobalt Layered Double Hydroxide Nanosheets Promoting Hydrazine Electro-Oxidation**

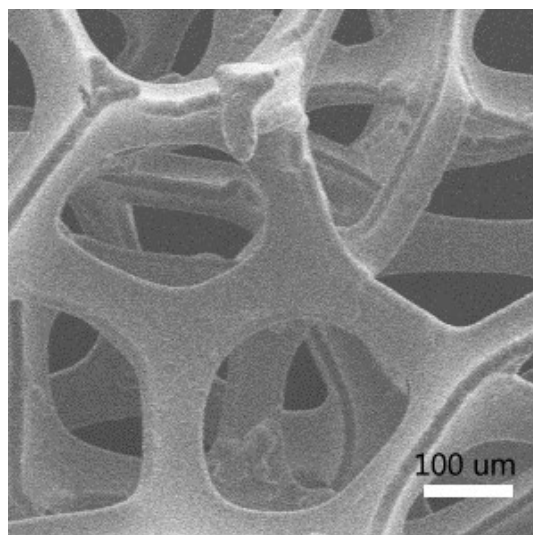

**Fig. S1** SEM image of the bare nickel foam.

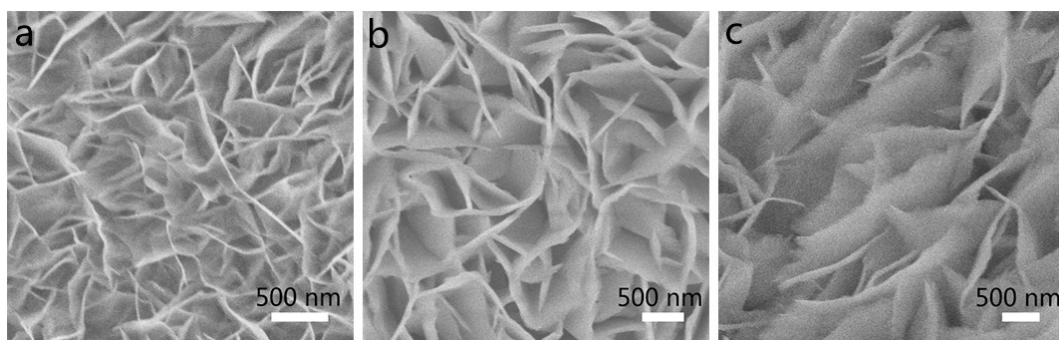

**Fig. S2** SEM images of (a) LDH-1, (b) LDH-2 and (c) LDH-4.

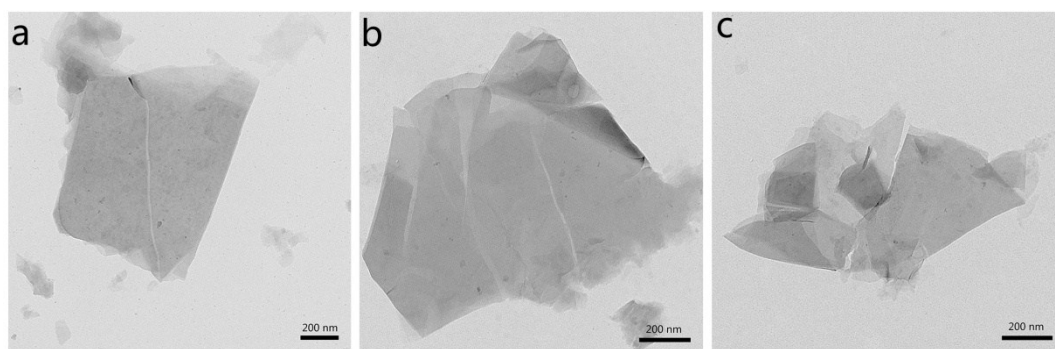

**Fig. S3** TEM images of the LDH nanosheet with (a) 0%, (b) 1% and (c) 10% Cu.

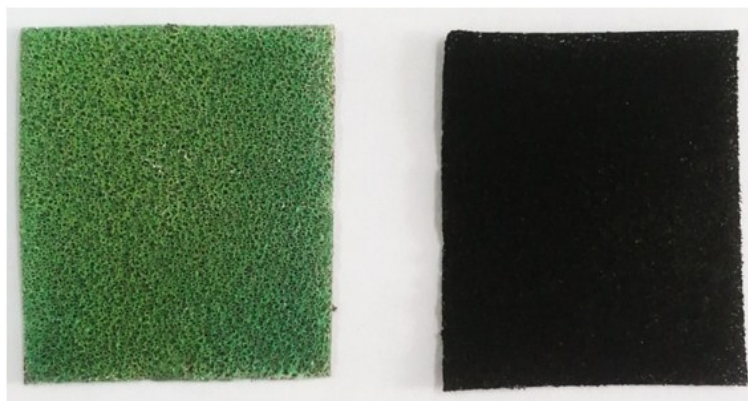

**Fig. S4** Image of the LDH-3 (green) and S-LDH-3 (black).

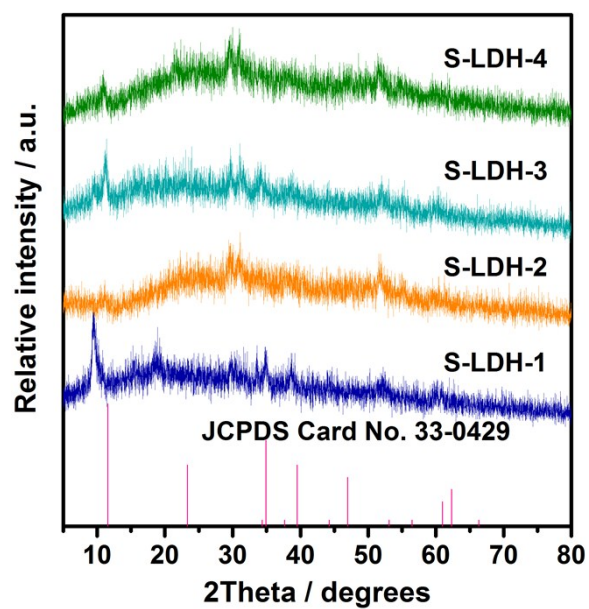

**Fig. S5** XRD patterns of the S-LDH nanosheets separated from the nickel foam.

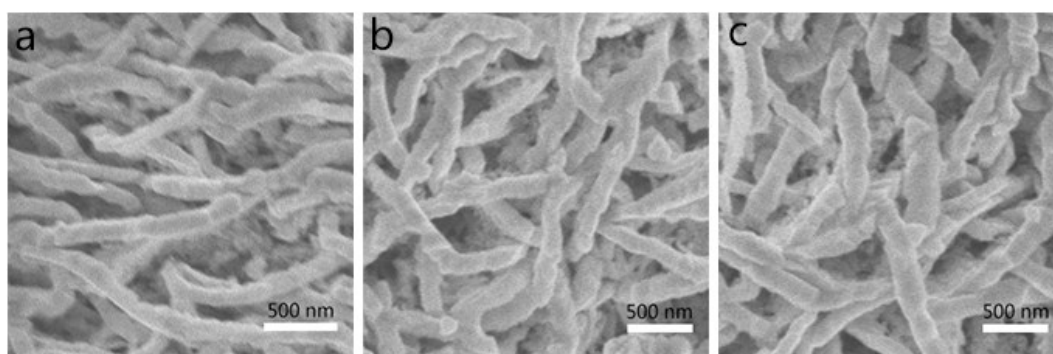

**Fig. S6** SEM images of (a) S-LDH-1, (b) S-LDH-2 and (c) S-LDH-4.

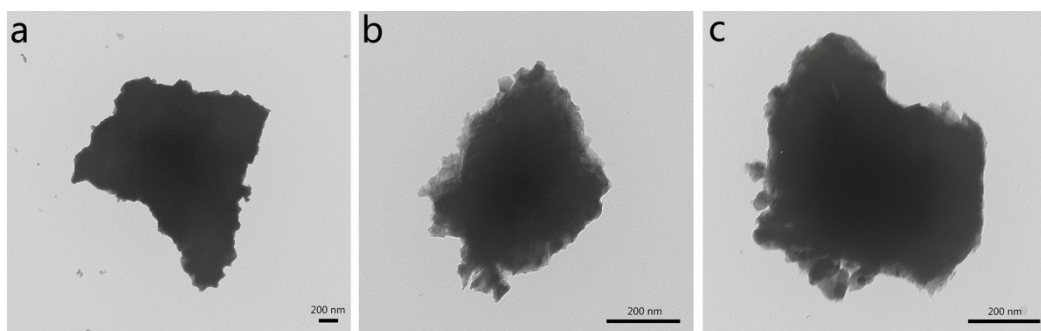

**Fig. S7** (a-c) TEM images of the sulfurized samples with (a) 0%, (b) 1% and (c) 10% Cu.

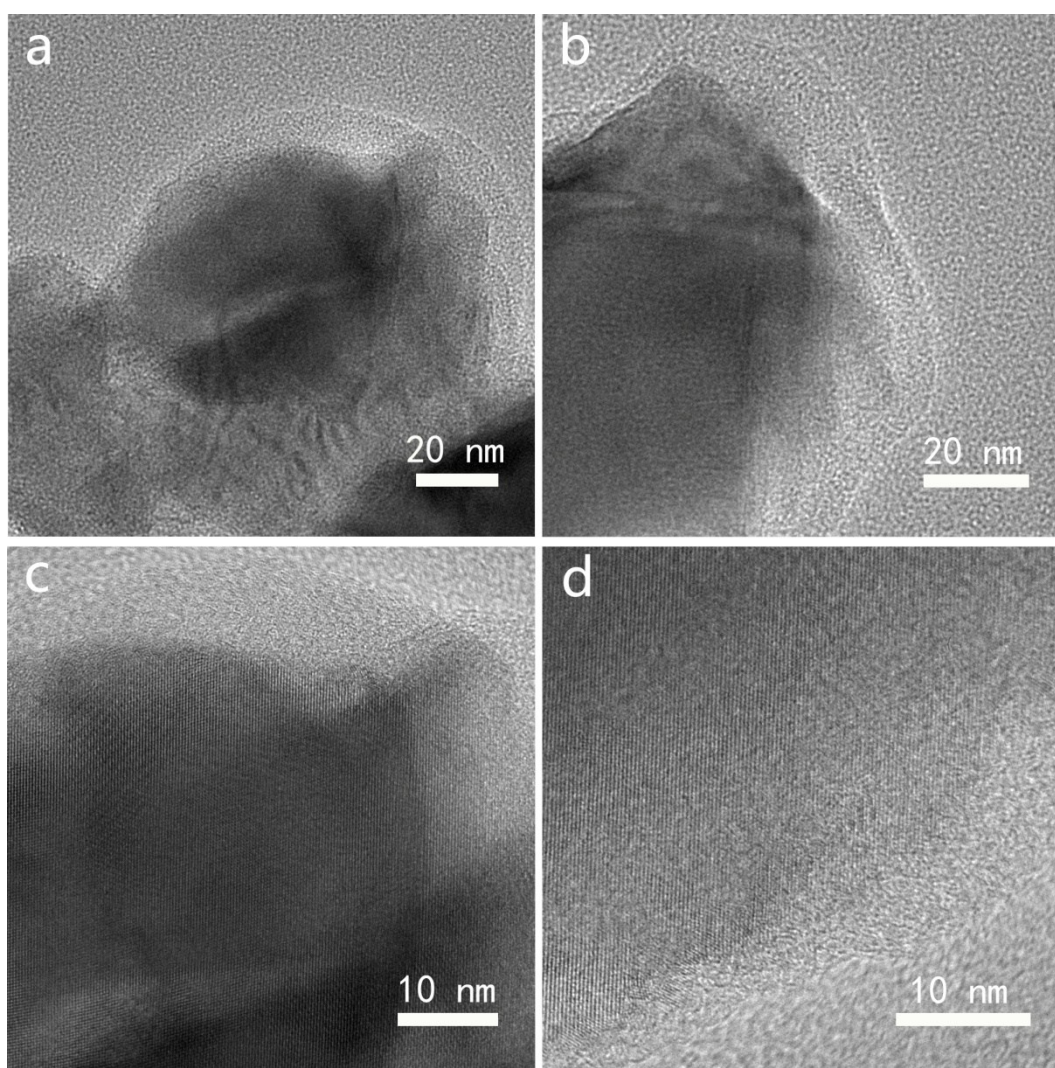

**Fig. S8** Additional HRTEM images of the S-LDH-3, where the sulfurization-induced edge amorphization can be clearly revealed.

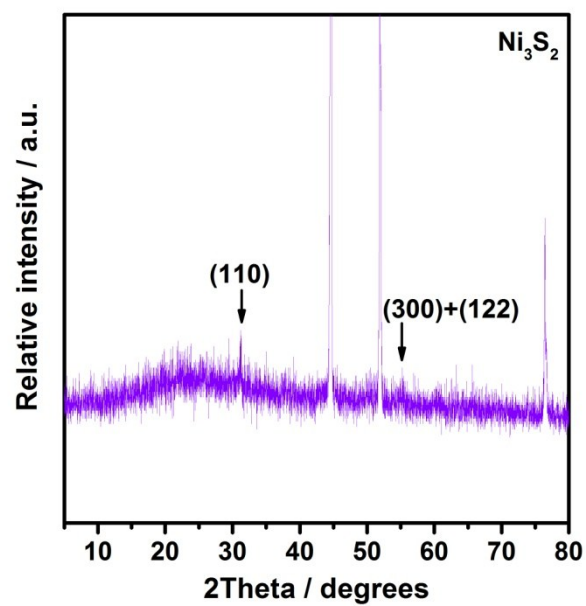

**Fig. S9** XRD pattern of S-NF, from which the  $\text{Ni}_3\text{S}_2$  phase can be identified.

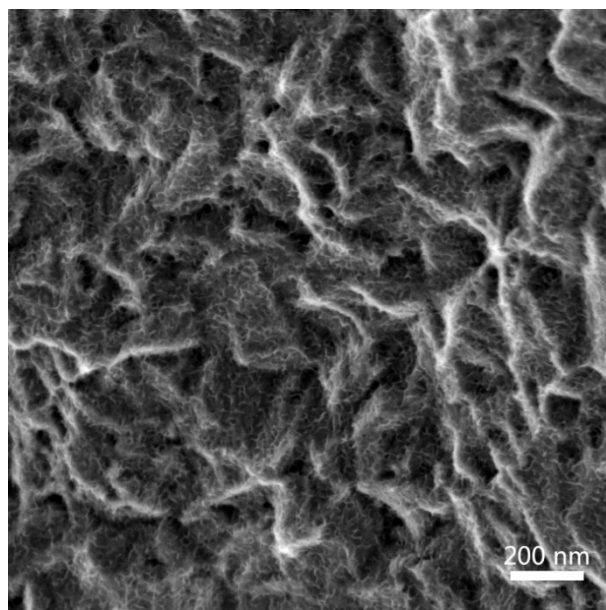

**Fig. S10** SEM image of S-NF.



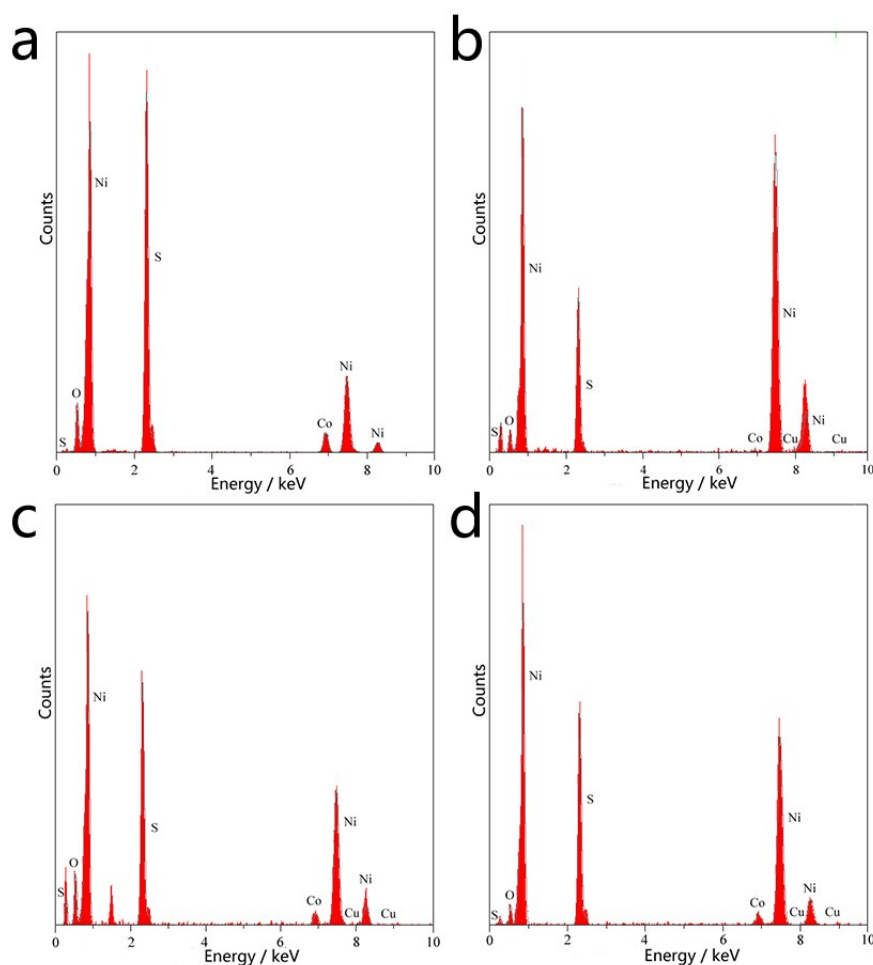

**Fig. S11** (a-d) EDS spectra of sulfurized LDH nanosheet arrays with 0%, 1%, 5% and 10% Cu.

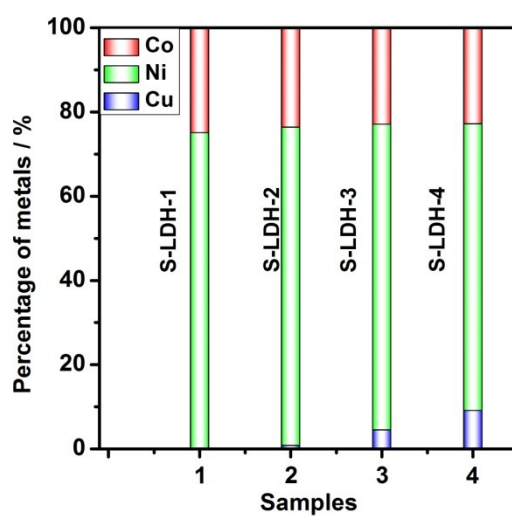

**Fig. S12** The inductively coupled plasma optical emission spectrometry (ICP-OES) results of the sulfurized LDH nanosheet arrays.

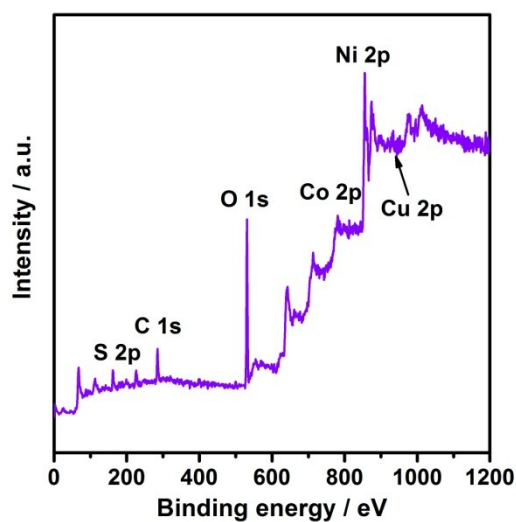

**Fig. S13** XPS survey spectrum of the S-LDH-3.

**Table S1** Loading weights of the samples.

| Samples   | mass /mg | Samples | mass /mg | Load weight / mg | Samples | mass /mg | Load weight / mg |
|-----------|----------|---------|----------|------------------|---------|----------|------------------|
| bare NF-1 | 356.8    | LDH-1   | 383.2    | 26.4             | S-LDH-1 | 371.8    | 15.0             |
| bare NF-2 | 332.1    | LDH-2   | 366.9    | 34.8             | S-LDH-2 | 349.7    | 17.6             |
| bare NF-3 | 339.7    | LDH-3   | 375.0    | 35.3             | S-LDH-3 | 355.5    | 15.8             |
| bare NF-4 | 322.8    | LDH-4   | 353.7    | 30.9             | S-LDH-4 | 337.5    | 14.7             |

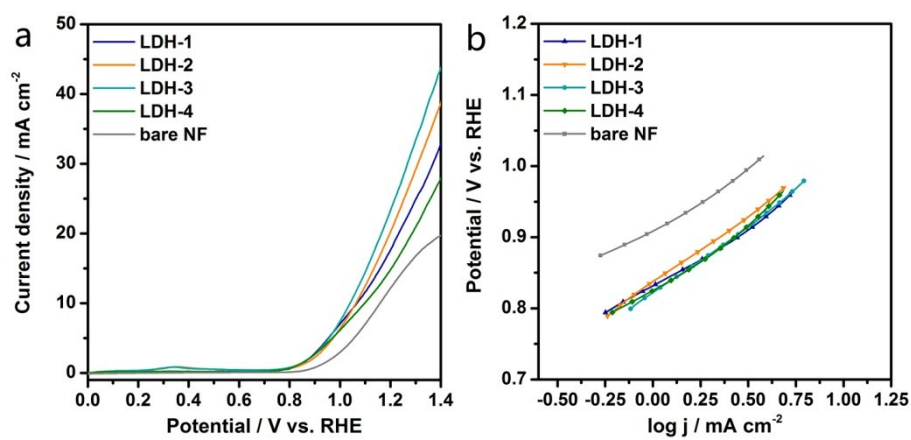

**Fig. S14** (a) Polarization curves of CuNiCo LDH nanosheet arrays and (b) Corresponding Tafel plots.

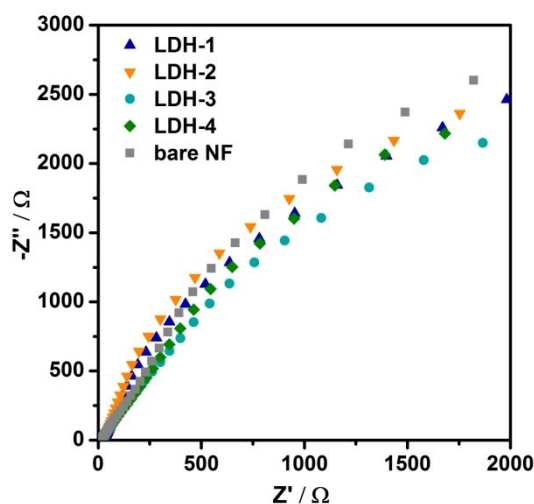

**Fig. S15** Nyquist plots of CuNiCo LDH nanosheet arrays and bare nickel foam measured at 0.4 V vs. RHE.

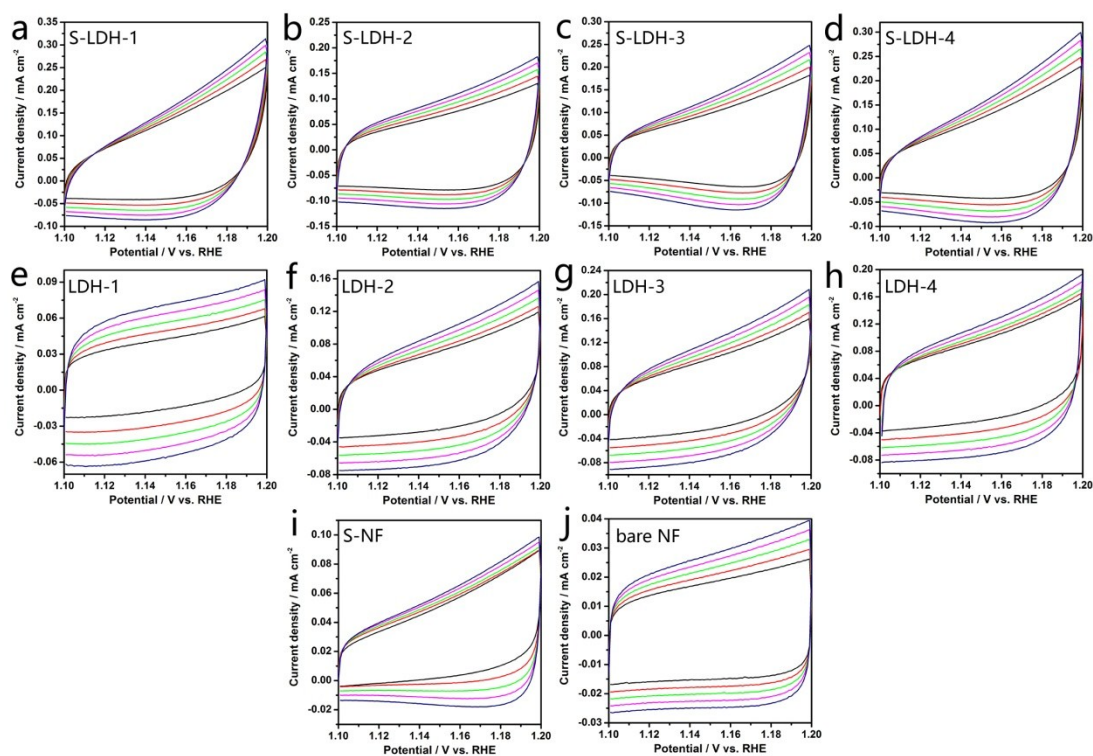

**Fig. S16** (a-j) CV curves of various catalysts measured at a non-redox region in 0.1M KOH for the calculation of electrochemical double-layer capacitances.

The effective active surface area of the samples was estimated according to the literature.<sup>1</sup> Cyclic voltammetry (CV) was performed at various scan rates (12, 14, 16...20 mV s<sup>-1</sup>, etc) in 1.1-1.2 V vs. RHE region. The electrochemical double-layer capacitance ( $C_{dl}$ ) of various samples can be determined from the cyclic voltammograms, which is expected to be linearly to the effective surface area (Fig.



S16). The double-layer capacitance is estimated by plotting the  $\Delta J$  ( $J_a - J_c$ ) at 1.15 V vs. RHE against the scan rate, where the slope is twice  $C_{dl}$ . The calculated values of electrochemical double-layer capacitance are listed in Table S2.

**Table S2.** List of the electrochemical double-layer capacitance ( $C_{dl}$ ).

| Samples | $C_{dl}$ [mF cm <sup>-2</sup> ] |
|---------|---------------------------------|
| S-LDH-1 | 4.2                             |
| S-LDH-2 | 4.3                             |
| S-LDH-3 | 5.2                             |
| S-LDH-4 | 5.0                             |
| LDH-1   | 4.3                             |
| LDH-2   | 4.1                             |
| LDH-3   | 4.9                             |
| LDH-4   | 4.5                             |
| S-NF    | 1.6                             |
| bare NF | 1.2                             |

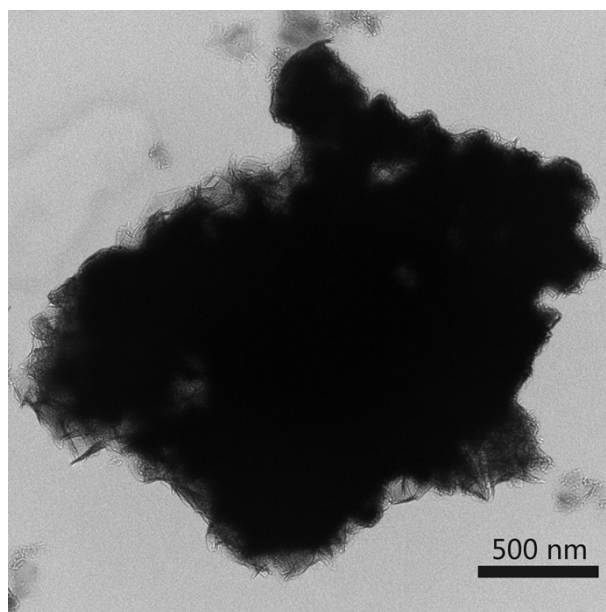

**Fig. S17** TEM image of the S-LDH-3 after 20h stability test.

## Reference

1. Xie, J.; Zhang, J.; Li, S.; Grote, F.; Zhang, X.; Zhang, H.; Wang, R.; Lei, Y.; Pan, B.; Xie, Y. *J. Am. Chem. Soc.* **2013**, *135*, 17881.
